# Supplementary material for: Two distinct binding modes provide the RNA-binding protein RbFox with extraordinary sequence specificity
Source: Springer Nature journal article supplement (doi:10.1038/s41467-023-36394-3), 2023-02-09
Supplement: MOESM1 [file 41467_2023_36394_MOESM1_ESM.pdf]

## Supplementary Materials

### **Two distinct binding modes provide the RNA-binding protein RbFox with extraordinary sequence specificity**

Xuan Ye, Wen Yang, Soon Yi, Yanan Zhao, Gabriele Varani, Eckhard Jankowsky, and Fan Yang

Twelve supplementary figures  
One supplementary table

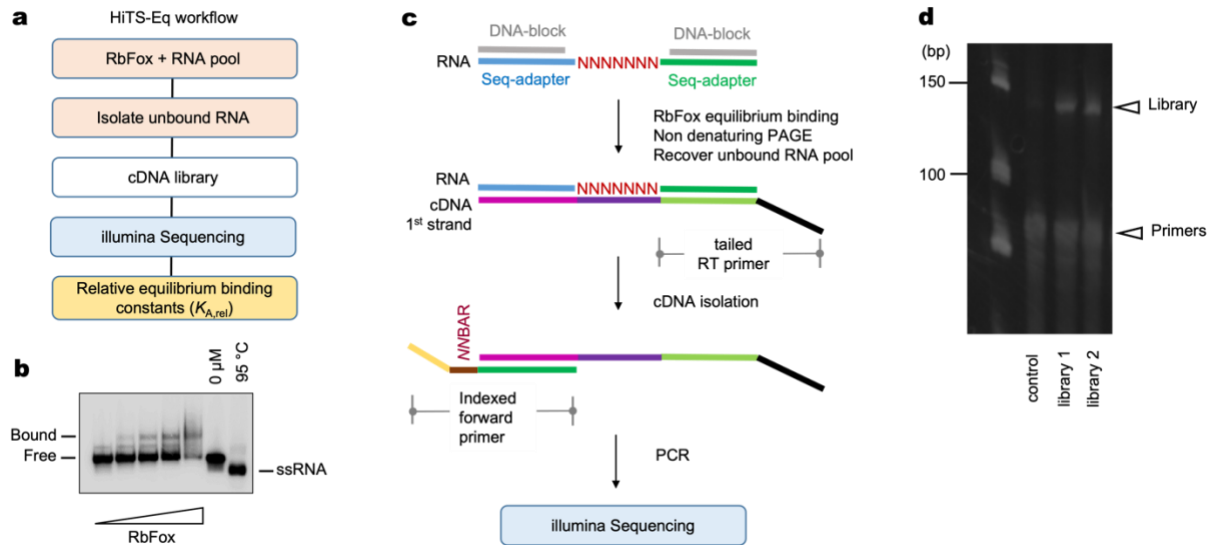

### Supplementary Figure 1. HiTS-Eq approach.

**a** HiTS-Eq workflow. **b** Representative PAGE for RbFox binding to the randomized RNA pool. The unbound RNA species were recovered and converted into NGS library according to the HiTS-Eq protocol. Data were replicated independently three times with similar results. **c** Preparation of HiTS-Eq libraries for illumina sequencing (detailed information: Methods). **d** Representative PAGE of the HiTS-Eq libraries (expected length: 137 bp). Data were replicated independently three times with similar results. Source data are provided as a Source Data file.

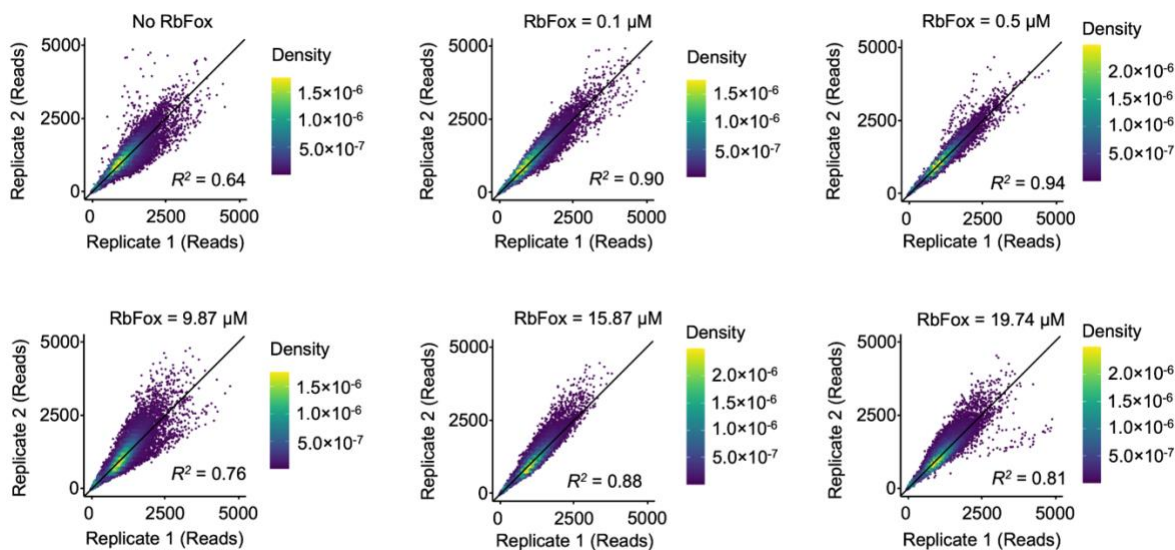

**Supplementary Figure 2. Correlation between HiTS-Eq replicates.**

Correlation between the two matched replicates for all 16,384 7-mer RNA sequence variants at different RbFox concentrations (line: diagonal,  $y = x$ ;  $R^2$ , correlation coefficient). Source data are provided as a Source Data file.

**a**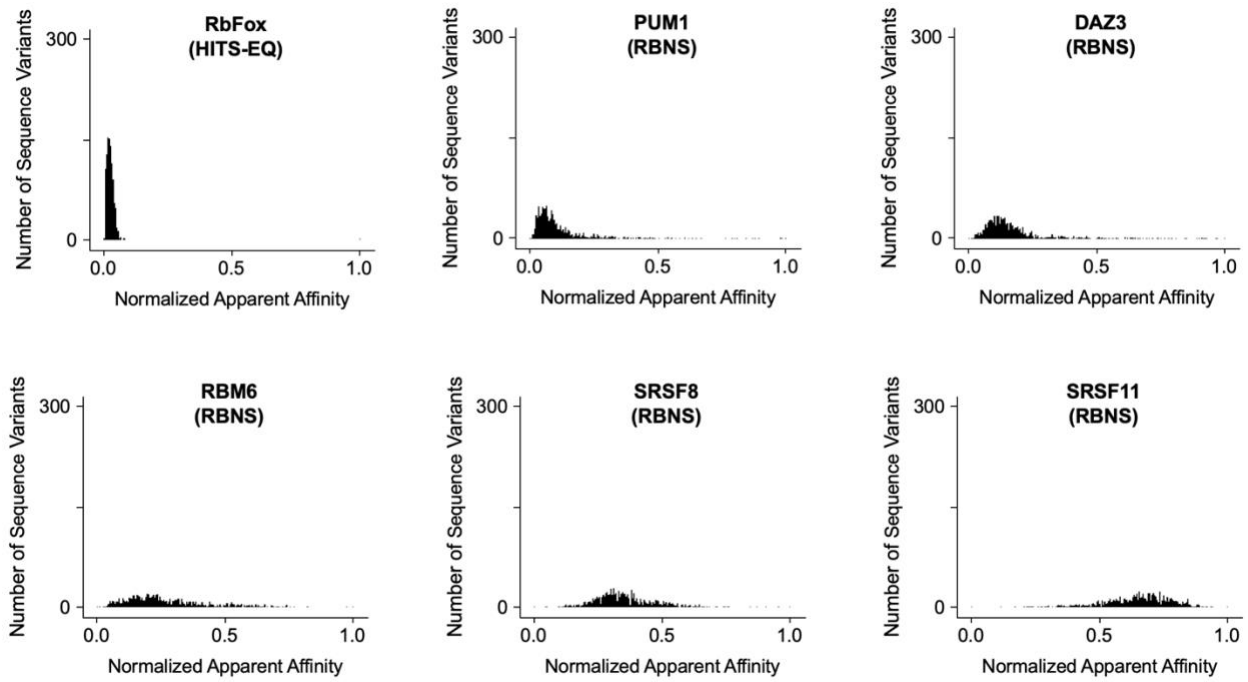**b**

| RBP    | Affinity Ratio (max/median) |
|--------|-----------------------------|
| RbFox  | 31.5                        |
| PUM1   | 12.4                        |
| DAZ3   | 7.3                         |
| RBM6   | 4.3                         |
| SRSF8  | 3.0                         |
| SRSF11 | 1.5                         |

**Supplementary Figure 3. Affinity distributions and ratios for six RBPs.**

**a** Global affinity distributions for six RBPs (RbFox, PUM1, DAZ3, RBM6, SRSF8, and SRSF11) from HiTS-Eq data and ENCODE RBNS datasets. **b** Affinity ratios between the highest affinity value to the median affinity value for the six RBPs. Source data are provided as a Source Data file.

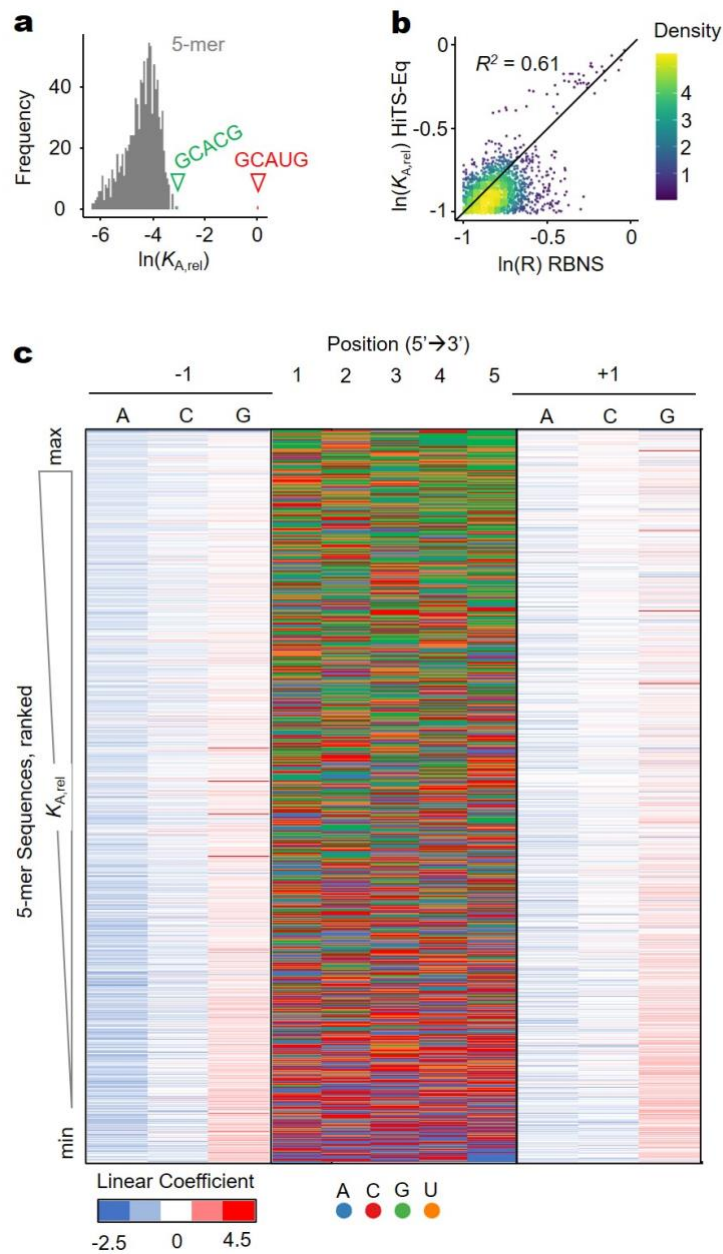

### Supplementary Figure 4. RbFox binding to 5-mer RNA variants.

**a** Distribution of relative association constants ( $K_{A,rel}$ ) of RbFox for all 1,024 5-mer RNA sequence variants (red triangle: reference GCAUG; green triangle: GCACG). **b** Correlation between relative association constants ( $K_{A,rel}$ ) from the HiTS-Eq measurements and R value from RNA Bind-n-Seq (RBNS) measurements for all 1,024 5-mer RNA sequence variants. (line: diagonal,  $y = x$ ;  $R^2$ , correlation coefficient). **c** Linear coefficient for -1 and +1 nucleotide position of all 1,024 5-mer RNA sequence variants calculated with the PWM binding model (negative values: destabilization). Source data are provided as a Source Data file.

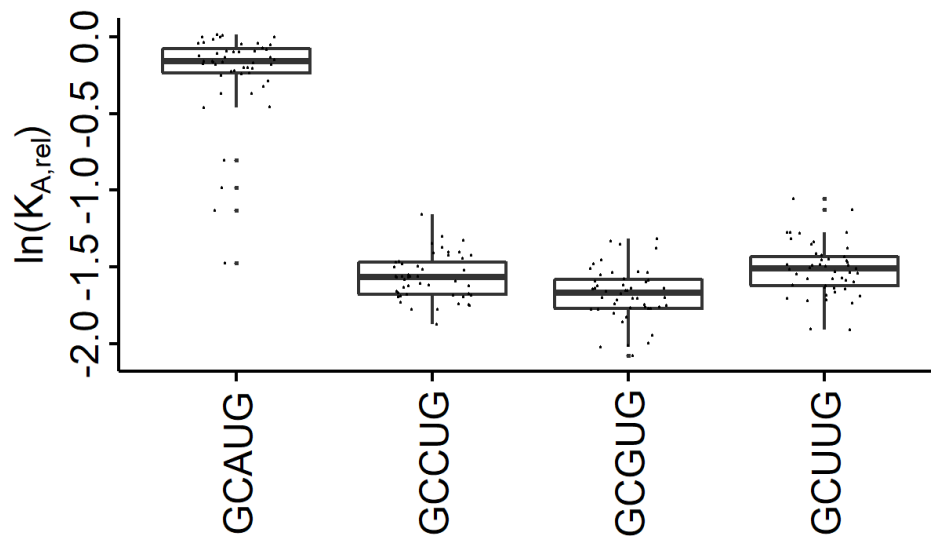

**Supplementary Figure 5. Analysis of the binding affinities to RbFox for 5'-GCNUG sequences.**

Relative affinities ( $K_{A,rel}$ ) for selected 5-mer RNA variants, indicated on the below. 48  $K_{A,rel}$  values correspond to all 5-mer with 7 randomized nucleotides (vertical line: median; box: variability through lower quartile and upper quartile; whiskers: variability outside the lower and upper quartiles). Source data are provided as a Source Data file.

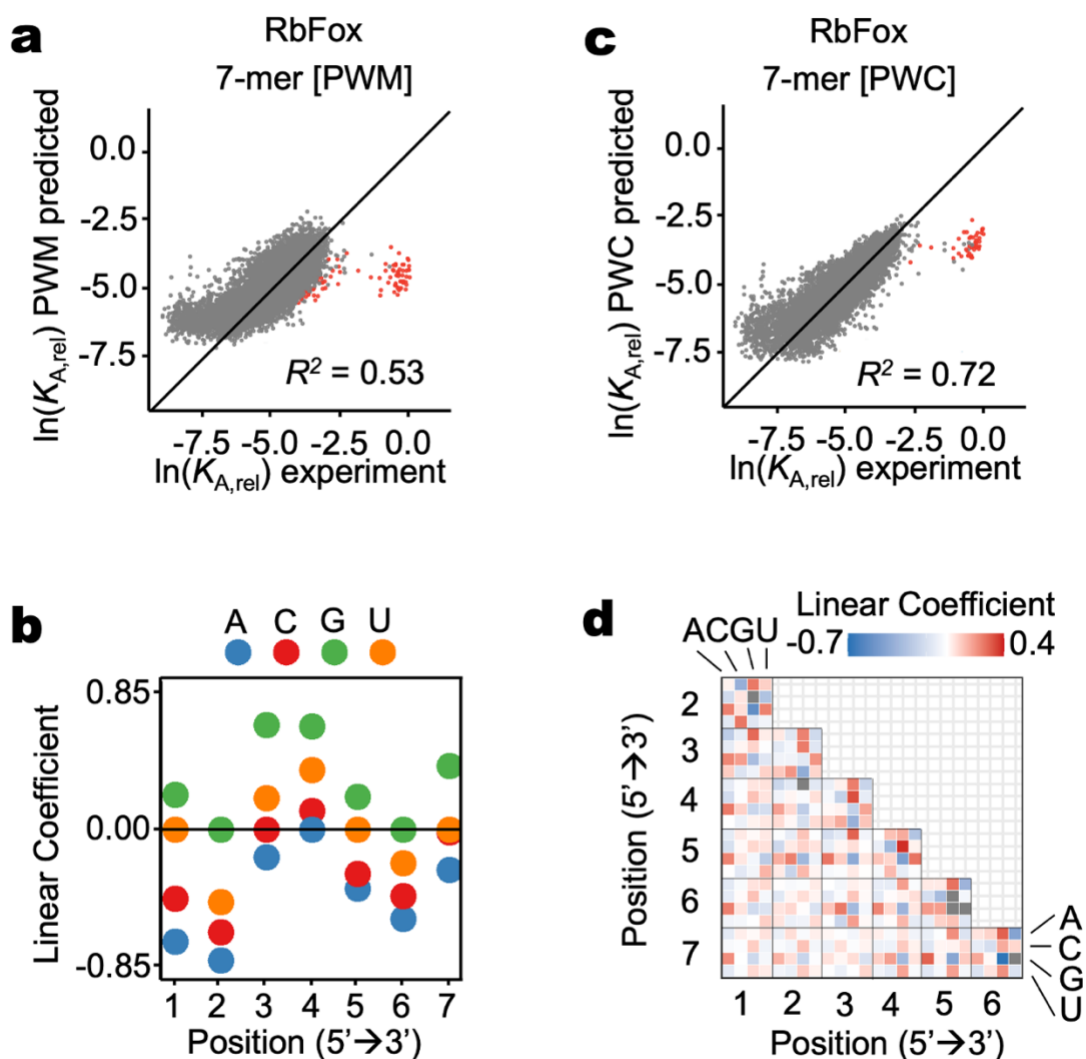

**Supplementary Figure 6. Analysis of RbFox binding to 7-mer RNA variants with quantitative binding models.**

**a** Correlation between experimental  $K_{A,rel}$  values for RbFox for each 7-mer with values calculated with the PWM binding model; (red dots: consensus 5-mer; line: diagonal,  $y = x$ ;  $R^2$ : correlation coefficient). **b** Linear coefficient for each nucleotide position calculated with the PWM binding model (negative values: destabilization). **c** Correlation between experimental  $K_{A,rel}$  values for RbFox<sup>mut</sup> for each 7-mer with values calculated with the PWC binding model (red dots: consensus 5-mer; line: diagonal,  $y = x$ ;  $R^2$ : correlation coefficient). **d** Linear coefficients for each pairwise coupling between all nucleotides calculated with the PWC model; (black frames: couplings in consensus 7-mer, negative values: destabilization). Source data are provided as a Source Data file.

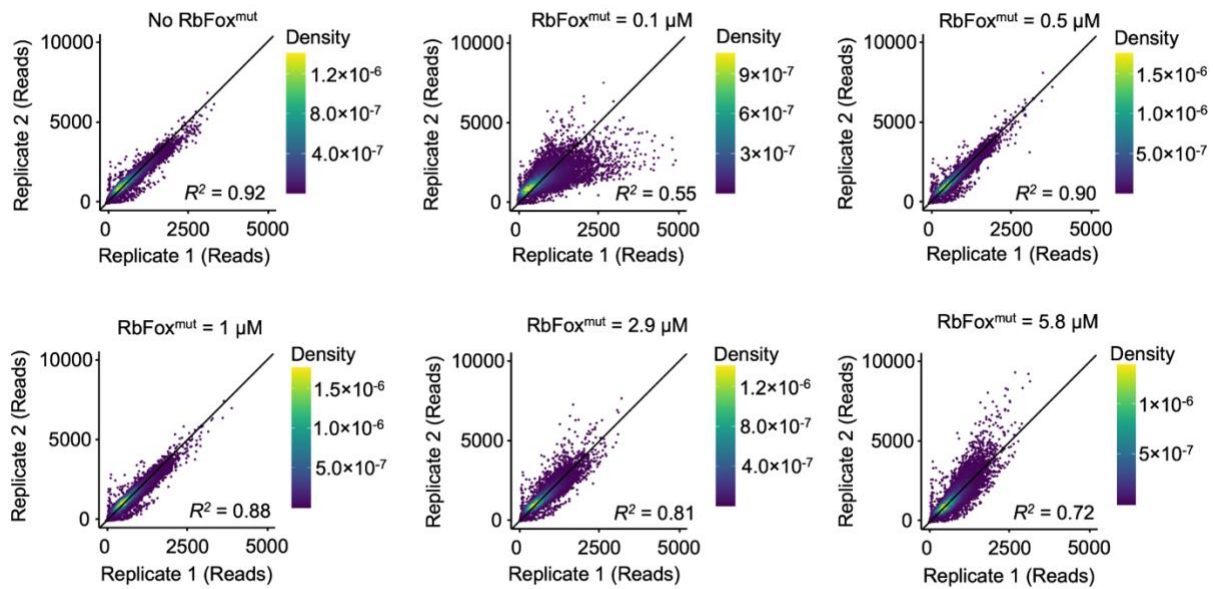

**Supplementary Figure 7. Correlation between HiTS-Eq replicates for RbFox<sup>mut</sup>.**

Correlation between the two matched replicates for all 16,384 7-mer RNA sequence variants at different RbFox<sup>mut</sup> concentrations; (line: diagonal,  $y = x$ ;  $R^2$ , correlation coefficient). Source data are provided as a Source Data file.

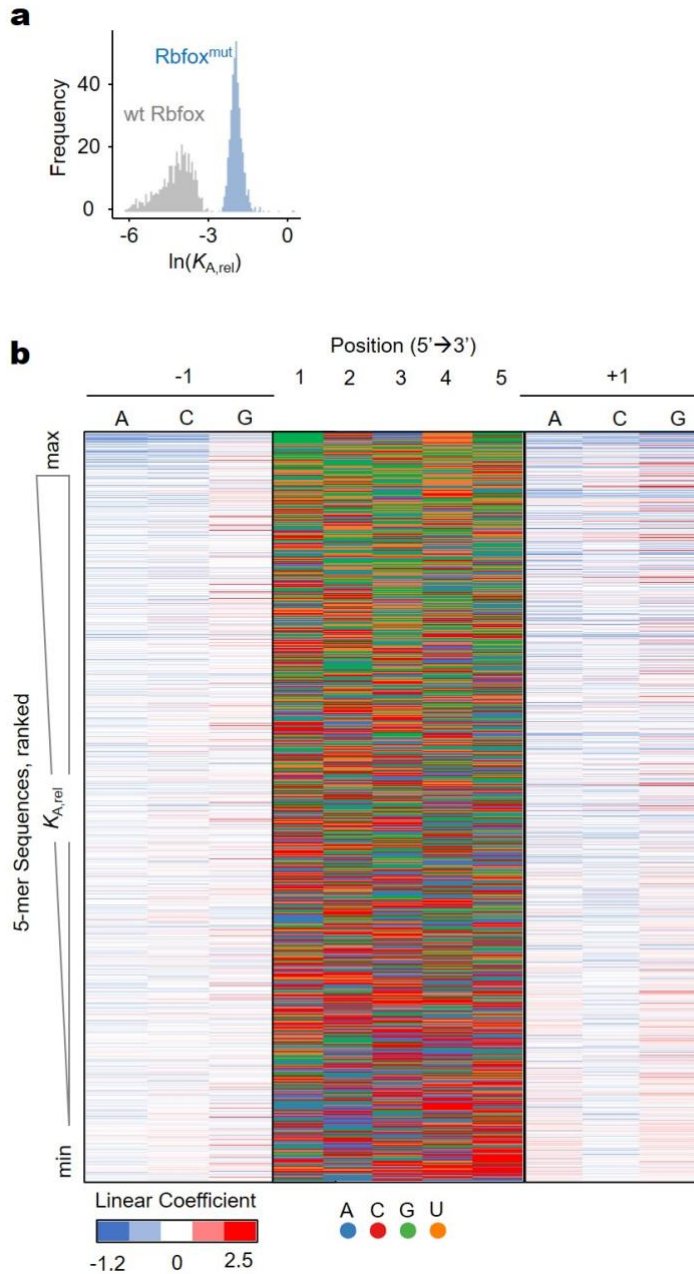

**Supplementary Figure 8. RbFox<sup>mut</sup> binding to 5-mer RNA variants.**

**a** Affinity distribution ( $K_{A,rel}$ ) of RbFox<sup>mut</sup> for all 5-mer RNA sequence variants (blue); (bin size: 100). For reference, the affinity distribution of wild type RbFox (grey) is provided as well. **b** Linear coefficient for -1 and +1 nucleotide position of all 1,024 5-mer RNA sequence variants calculated with the PWM binding model (negative values: destabilization). Source data are provided as a Source Data file.

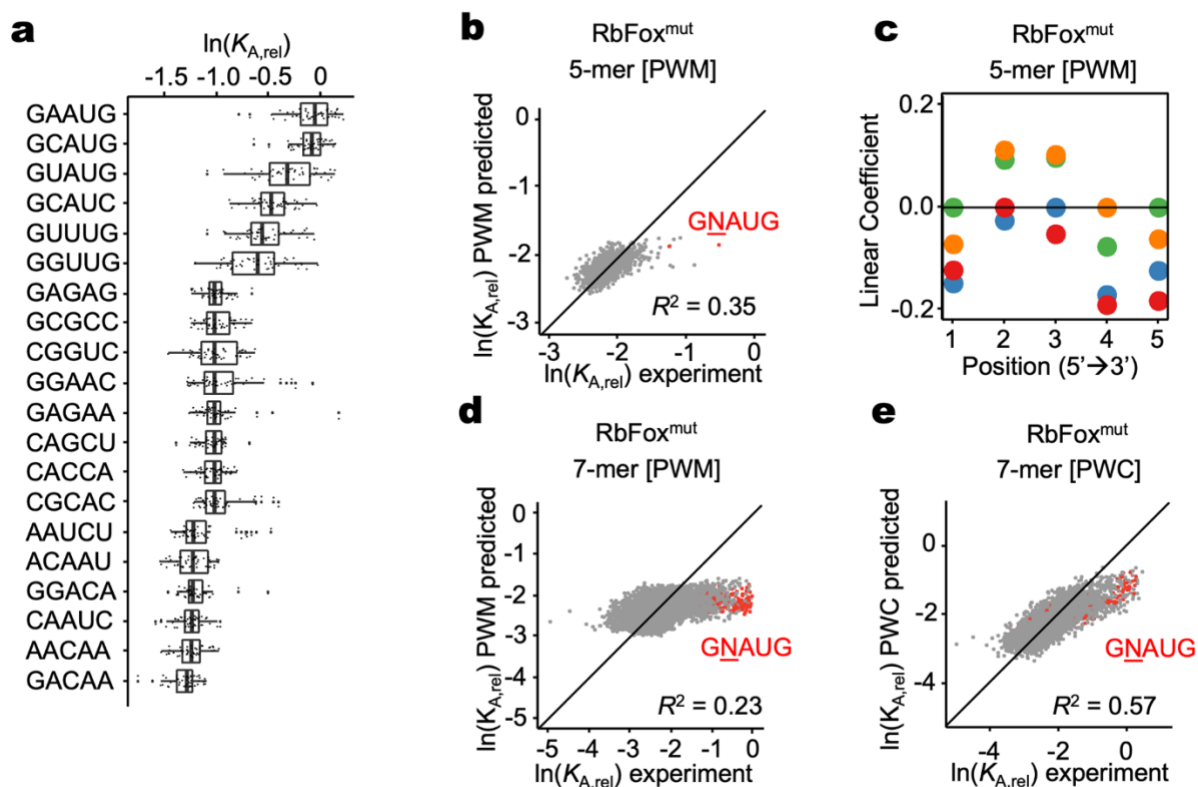

**Supplementary Figure 9. Analysis of RbFox<sup>mut</sup> RNA binding with quantitative binding models.**

**a** Relative affinities ( $K_{A,rel}$ ) for selected 5-mer RNA variants, as indicated on the left. 48  $K_{A,rel}$  values correspond to all 5-mer with 7 randomized nucleotides (vertical line: median; box: variability through lower quartile and upper quartile; whiskers: variability outside the lower and upper quartiles). **b** Correlation between experimental  $K_{A,rel}$  values for each 5-mer (median value, panel **a**) and values calculated with the PWM binding model (red dots: consensus 5-mer; line: diagonal,  $y = x$ ;  $R^2$ : correlation coefficient). **c** Linear coefficients for each nucleotide position calculated with the PWM binding model (negative values: destabilization). **d** Correlation between experimental  $K_{A,rel}$  values for each 7-mer (median value, panel **a**) and values calculated with the PWM binding model (red dots: consensus 5-mer; line: diagonal,  $y = x$ ;  $R^2$ : correlation coefficient). **e** Correlation between experimental  $K_{A,rel}$  values for each 7-mer (median value, panel **a**) and values calculated with the PWC binding model (red dots: consensus 5-mer; line: diagonal,  $y = x$ ;  $R^2$ : correlation coefficient). Source data are provided as a Source Data file.

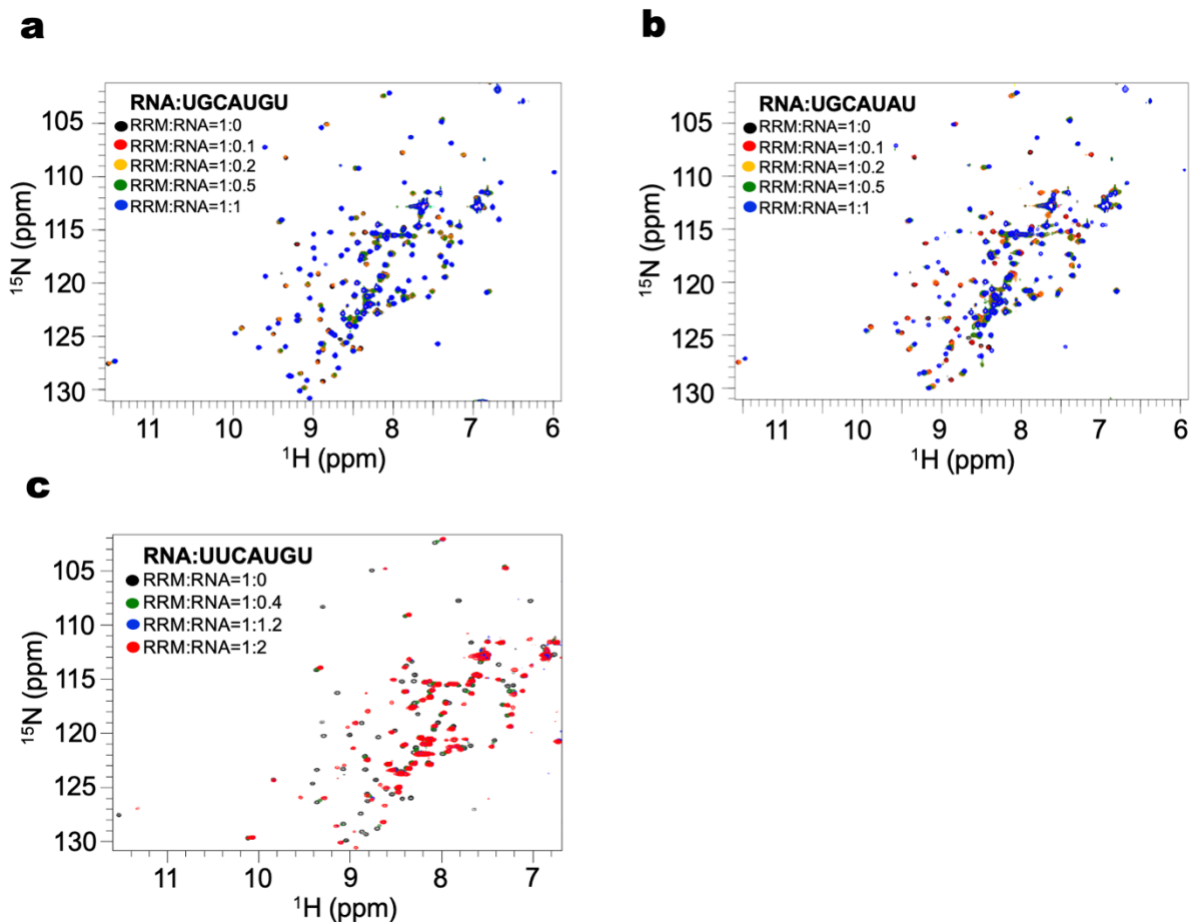

**Supplementary Figure 10.  $^1\text{H}$ - $^{15}\text{N}$  HSQC titrations of RbFox RRM with three RNAs: 5'-UGCAUGU, 5'-UGCAUUAU and 5'-UUCAUGU.**

**a** Superposition of  $^1\text{H}$ - $^{15}\text{N}$  HSQC spectra obtained with  $^{15}\text{N}$ -RbFox RRM and increasing amount of 5'-UGCAUGU RNA. The peaks corresponding to the free and RNA-bound RRMs (RRM:RNA ratios of 1:0, 1:0.1, 1:0.2, 1:0.5 and 1:1) are colored as black, red, orange, green and blue, respectively. **b** Superposition of  $^1\text{H}$ - $^{15}\text{N}$  HSQC spectra obtained with  $^{15}\text{N}$ -RbFox RRM and increasing amount of 5'-UGCAUUAU RNA. The color scheme is the same as in **a**. **c** Superposition of  $^1\text{H}$ - $^{15}\text{N}$  HSQC spectra obtained with  $^{15}\text{N}$ -RbFox RRM and increasing amount of 5'-UUCAUGU RNA. The peaks corresponding to the free and RNA-bound RRMs (RRM:RNA ratios of 1:0, 1:0.4, 1:1.2, and 1:2) are colored as black, green, blue and red, respectively.

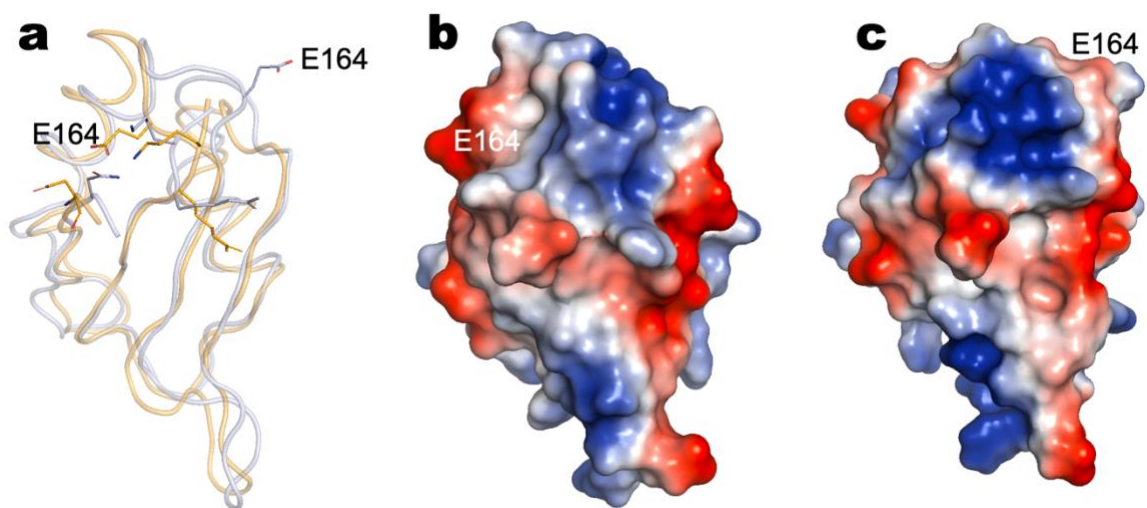

**Supplementary Figure 11. Comparison of the surface electrostatics of the two RbFox-RNA complexes.**

**a** Ribbon diagrams of the superposed RbFox structures bound to the different RNA (blue: complex with 5'-UGCAUGU; orange: complex with 5'-UGCAUUAU). The side chain of the flipped out E164 residue which alters surface electrostatics through its relocation is explicitly labeled. **b,c** Surface electrostatics for the two RbFox-RNA complexes with 5'-UGCAUGU and 5'-UGCAUUAU, respectively.

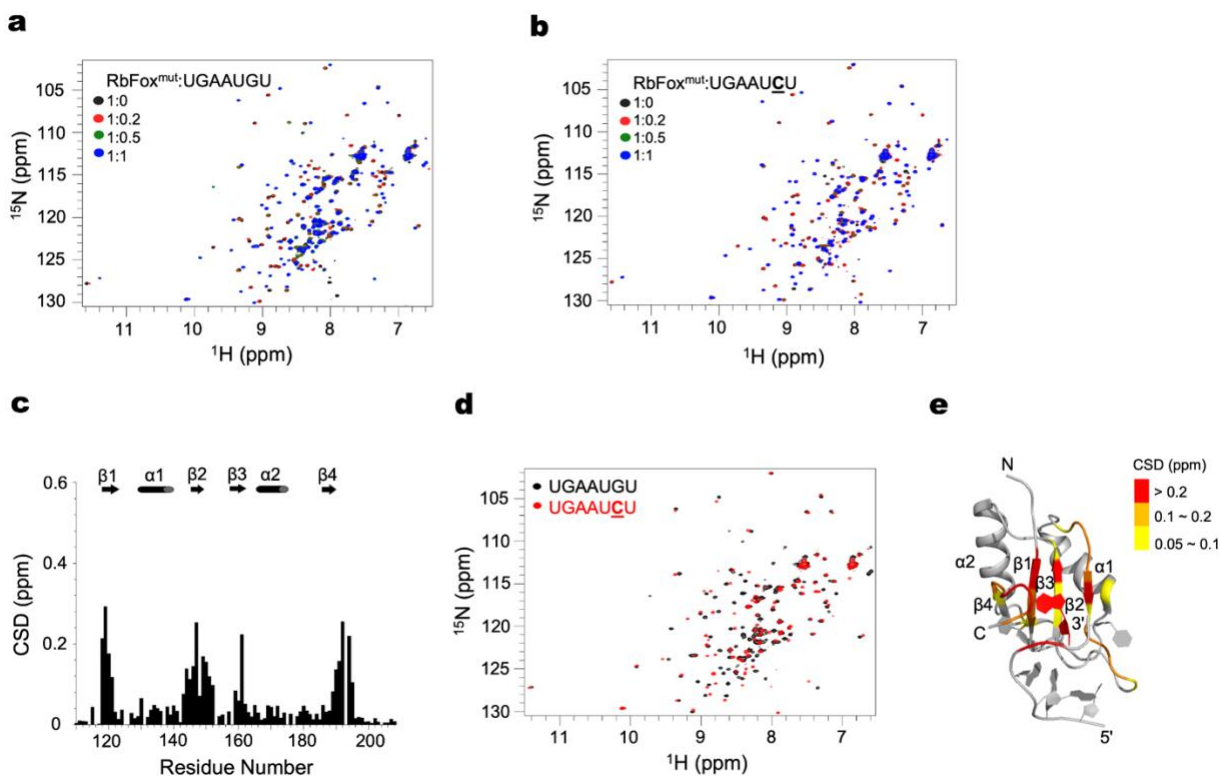

**Supplementary Figure 12. Characterization of RbFox<sup>mut</sup> bound to two RNAs: 5'-UGAAUGU and 5'-UGAAUCU.**

**a** Superposition of  $^1\text{H}$ - $^{15}\text{N}$  HSQC spectra obtained with  $^{15}\text{N}$ -RbFox<sup>mut</sup> and increasing amounts of 5'-UGAAUGU RNA. The peaks corresponding to the free and RNA-bound RbFox<sup>mut</sup>s (RRM:RNA ratios of 1:0, 1:0.2, 1:0.5 and 1:1) are colored as black, red, green and blue, respectively. **b** Superposition of  $^1\text{H}$ - $^{15}\text{N}$  HSQC spectra obtained with  $^{15}\text{N}$ -RbFox<sup>mut</sup> and increasing amounts of 5'-UGAAUCU RNA. The color scheme is the same as in **a**. **c** Chemical shift difference (CSD) between RbFox<sup>mut</sup> bound to 5'-UGAAUGU and 5'-UGAAUCU. **d** Superposition of  $^1\text{H}$ - $^{15}\text{N}$  HSQC spectra of RbFox<sup>mut</sup> complexed with the two RNAs (black: 5'-UGAAUGU; red: 5'-UGAAUCU). **e** Mapping of the CSDs in panel **c** onto the structure of the RbFox-RNA complex (pdb #2ERR) (red: CSD > 0.2 ppm; orange: 0.1 ppm < CSD < 0.2 ppm; yellow: 0.05 ppm < CSD < 0.1 ppm). Source data are provided as a Source Data file.

**Supplementary Table 1. NMR structure statistics for RbFox RRM bound to 5'-UGCAUUAU.**

| <b>Distance constraints</b>                                  |       |
|--------------------------------------------------------------|-------|
| Total NOEs                                                   | 2020  |
| Protein-RNA intermolecular                                   | 130   |
| RNA intramolecular                                           | 95    |
| Protein intramolecular                                       | 1795  |
| Protein intra-residue                                        | 421   |
| Sequential ( $ i-j =1$ )                                     | 480   |
| Medium range ( $1 <  i-j  < 5$ )                             | 287   |
| Long range ( $ i-j  \geq 5$ )                                | 607   |
| Hydrogen-bond constraints                                    | 16    |
| Torsion angle constraints                                    | 100   |
| <b>Structure statistics (20 structures of lowest energy)</b> |       |
| Violations                                                   |       |
| NOE violations $> 0.3 \text{ \AA}$                           | 0     |
| Torsion angle violations $> 5^\circ$                         | 0     |
| Ramachandran plot statistics                                 |       |
| Residues in most favored regions                             | 82.0% |
| Residues in additional allowed regions                       | 14.6% |
| Residues in generously allowed regions                       | 2.2%  |
| Residues in disallowed regions                               | 1.1%  |
| RMS deviations from the mean structure                       |       |
| Protein backbone (Pro116-Arg194)                             | 0.74  |
| Protein heavy atoms (Pro116-Arg194)                          | 1.20  |
| RNA heavy atoms (G2-A6)                                      | 2.70  |
| Complex heavy atoms (G2-A6 and Pro116-Arg194 )               | 2.79  |
